# Supplementary figures and images for: A short, unsupported Cu(i)⋯Cu(i) interaction, 2.65 Å, in a dinuclear guanidine chloride complex
Source: Royal Society of Chemistry journal article supplement (doi:10.1039/b918912b), 2009-11-13

# $^1\text{H-NMR}$ Spectrum of $[\text{Cu}(\text{Hhpp})\text{Cl}]_2$ in benzene- $\text{d}_6$ 8.4 mmolar

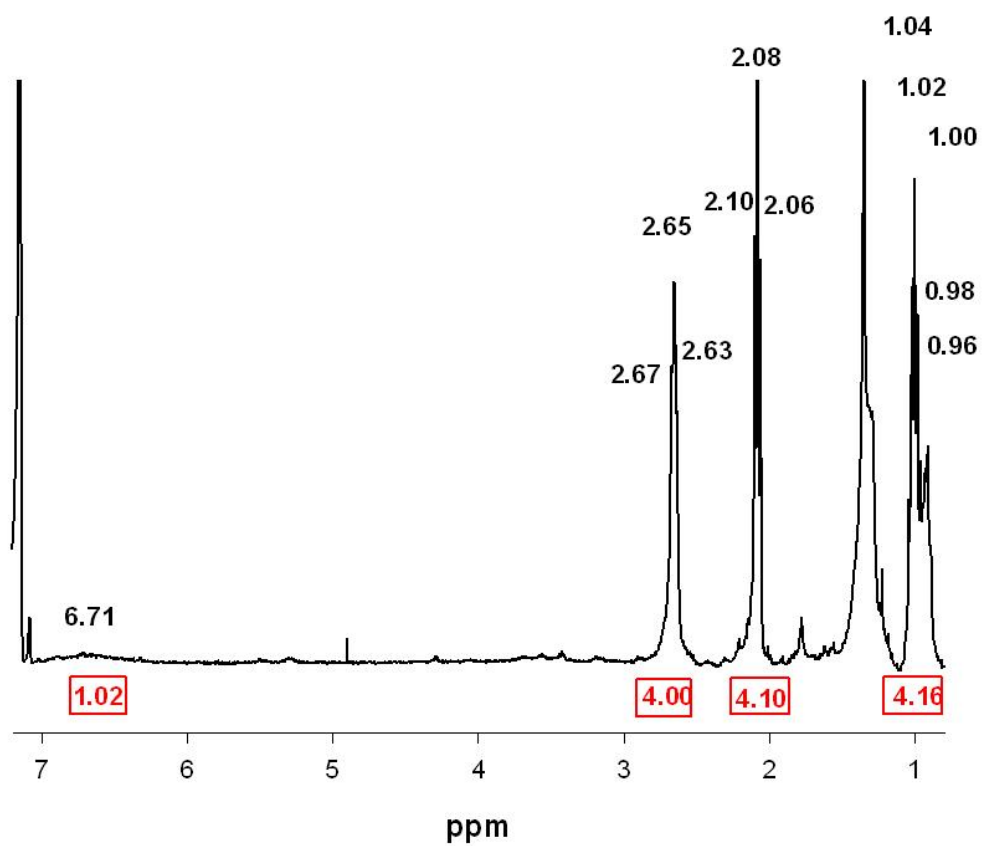

Supplement: h1-nmr.pdf [file h1-nmr.pdf]

## IR Spectrum of $[\text{Cu}(\text{Hhpp})\text{Cl}]_2$ in KBr

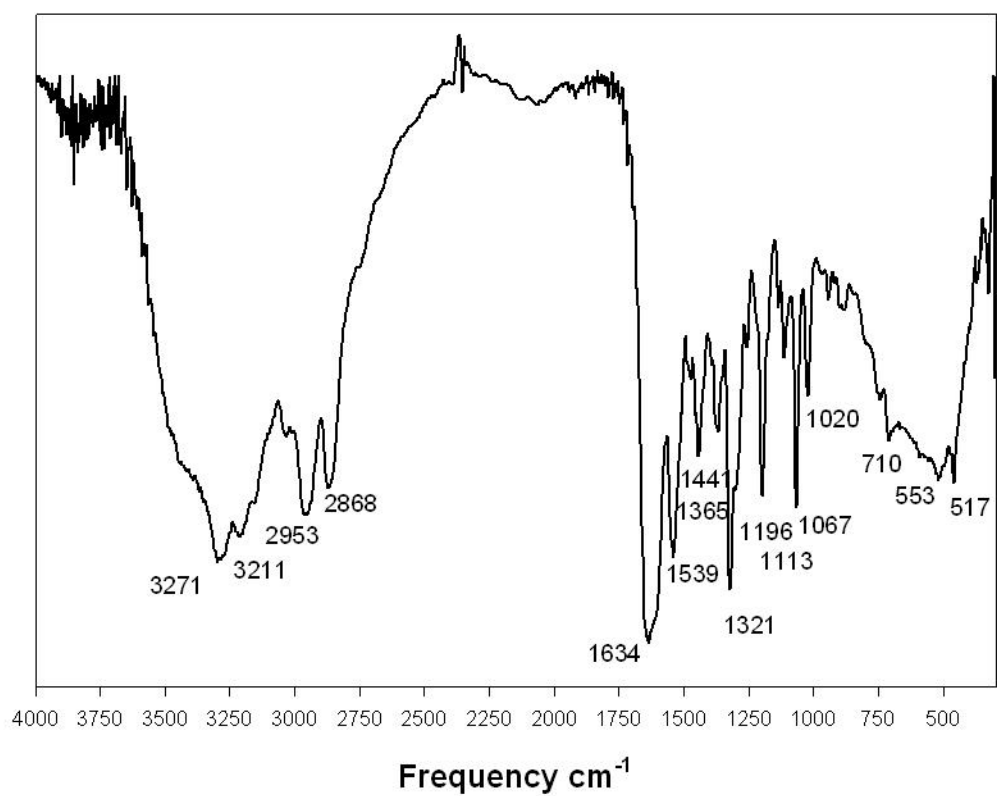

Supplement: ir.pdf [file ir.pdf]
